# Supplementary material for: Stoichiometry of lanthanide(iii) complexes with tripodal aminophosphonic ligands – a new solution to an old problem
Source: Royal Society of Chemistry journal article supplement (doi:10.1039/c7qi00191f), 2017-01-01

### Electronic Supplementary Information

**Table 1S.** The fitting parameters for equation 4, determined from the spectra of the  ${}^5D_0 \rightarrow {}^7F_{1,2,4}$  transitions of  $[Eu(NP_2py)_2]^{5-}$  complex in aqueous solution.

**Table 2S.** Selected luminescent data of Eu- $NP_2py$  and Tb- $NP_2py$  systems

**Table 3S.** The complex formation constants of  $NP_2Py$  with  $Sm^{3+}$ ,  $Eu^{3+}$ ,  $Gd^{3+}$  and  $Tb^{3+}$  at  $25^\circ C$ ,  $I=0.1 \text{ mol dm}^{-1}$  ( $NaClO_4$ ), in 1:1 and 1:2 molar ratios Ln:L.

**Table 4S.** Stability constants of  $NP_2Py$  with  $Eu^{3+}$  at  $25^\circ C$  in different ionic strength (KCl).

**Figure 1S.** Fosforescence spectrum of  $[C(NH_2)_3]_5[Gd(NP_2py)_2] \cdot 12H_2O$  crystals at 77K.

**Figure 2S.** The plot of luminescence quantum yields of Tb: $NP_2py$  1:1 and 1:2 systems versus pH.

**Figure 3S.** UV spectra of  $NP_2py$  ligand and Tb: $NP_2py$  complex at various pH.

**Figure 4S.** Plot of  $q_{H_2O}$  versus pH of solution for the Eu- $NP_2py$  complex with Eu: $NP_2py$  ratio of 1:1 and 1:2. The  $\Delta q_{H_2O}$  is the difference between  $q_{H_2O}$  for 1:1 and 1:2 solutions at the same pH.

**Figure 5S.** Plot of  $q_{H_2O}$  versus pH of solution for the Tb- $NP_2py$  complex with Tb: $NP_2py$  ratio of 1:1 and 1:2.

**Figure 6S.** Species distribution curves of  $H_6NP_2py$  acid (L). Charges omitted for brevity.

**Figure 7S.** Species distribution curves for the  $Ln^{3+}-N_2Py$  complexes as a function of pH for 1:1 Ln:L molar ratio (A) and 1:2 Ln:L (B). Equimolar complexes are marked in blue, biscomplexes in red color,  $I=0.1MNaClO_4$ ,  $25^\circ C$

**Table 1S.** The fitting parameters for equation 4, determined from the spectra of the  ${}^5D_0 \rightarrow {}^7F_{1,2,4}$  transitions of  $[\text{Eu}(\text{NP}_2\text{py})_2]^{5-}$  complex in aqueous solution

|                               | $J_{\text{max}}$ | $\lambda_{\text{max}}$ | $\Delta\lambda$ |
|-------------------------------|------------------|------------------------|-----------------|
| ${}^5D_0 \rightarrow {}^7F_1$ | 0.1400           | 583.56                 | 1.342           |
|                               | 0.0199           | 588.45                 | 2.157           |
|                               | 0.1308           | 591.90                 | 0.959           |
|                               | 0.1218           | 593.98                 | 1.527           |
| ${}^5D_0 \rightarrow {}^7F_2$ | 0.0256           | 607.02                 | 0.6188          |
|                               | 0.1221           | 609.07                 | 1.7005          |
|                               | 0.0213           | 616.28                 | 3.3322          |
|                               | 0.0557           | 623.46                 | 2.2017          |
|                               | 0.0177           | 628.28                 | 1.3291          |
|                               | 0.0079           | 633.21                 | 3.1611          |
| ${}^5D_0 \rightarrow {}^7F_4$ | 0.0129           | 676.80                 | 1.8536          |
|                               | 0.0024           | 682.88                 | 2.1403          |
|                               | 0.0364           | 692.14                 | 1.7467          |
|                               | 0.0051           | 696.62                 | 3.5550          |
|                               | 0.0096           | 701.36                 | 2.6330          |
|                               | 0.0444           | 703.76                 | 0.9719          |
|                               | 0.0115           | 709.34                 | 3.1173          |

**Table 2S.** Selected luminescent data of Eu-NP<sub>2</sub>py and Tb-NP<sub>2</sub>py systems

| Compound                                                                                                                 | $\lambda_{\max}$ / nm | Assignment                | $\tau$ / $\mu$ s | $\Phi$ / % |
|--------------------------------------------------------------------------------------------------------------------------|-----------------------|---------------------------|------------------|------------|
| Eu:NP <sub>2</sub> py=1:1; pH = 10                                                                                       | 578.65                | $^5D_0 \rightarrow ^7F_0$ | 360              | ~6         |
|                                                                                                                          | 591.80                | $^5D_0 \rightarrow ^7F_1$ |                  |            |
|                                                                                                                          | 612.20                | $^5D_0 \rightarrow ^7F_2$ |                  |            |
|                                                                                                                          | 650.60                | $^5D_0 \rightarrow ^7F_3$ |                  |            |
|                                                                                                                          | 700.80                | $^5D_0 \rightarrow ^7F_4$ |                  |            |
| Eu:NP <sub>2</sub> py=1:2; pH = 10                                                                                       | 578.50                | $^5D_0 \rightarrow ^7F_0$ | 815              | ~10        |
|                                                                                                                          | 592.00                | $^5D_0 \rightarrow ^7F_1$ |                  |            |
|                                                                                                                          | 610.80                | $^5D_0 \rightarrow ^7F_2$ |                  |            |
|                                                                                                                          | 650.60                | $^5D_0 \rightarrow ^7F_3$ |                  |            |
|                                                                                                                          | 701.30                | $^5D_0 \rightarrow ^7F_4$ |                  |            |
| [C(NH <sub>2</sub> ) <sub>3</sub> ] <sub>5</sub> [Eu(NP <sub>2</sub> py) <sub>2</sub> ] <sub>5</sub> ·12H <sub>2</sub> O | 576.90                | $^5D_0 \rightarrow ^7F_0$ | 1840             | ~20        |
|                                                                                                                          | 582.95                | $^5D_0 \rightarrow ^7F_1$ |                  |            |
|                                                                                                                          | 609.15                | $^5D_0 \rightarrow ^7F_2$ |                  |            |
|                                                                                                                          | 644.05                | $^5D_0 \rightarrow ^7F_3$ |                  |            |
|                                                                                                                          | 692.85                | $^5D_0 \rightarrow ^7F_4$ |                  |            |
| Tb:NP <sub>2</sub> py=1:1; pH = 10                                                                                       | 488.50                | $^5D_4 \rightarrow ^7F_6$ | 1550             | 4.5        |
|                                                                                                                          | 544.50                | $^5D_4 \rightarrow ^7F_5$ |                  |            |
|                                                                                                                          | 587.50                | $^5D_4 \rightarrow ^7F_4$ |                  |            |
|                                                                                                                          | 621.00                | $^5D_4 \rightarrow ^7F_3$ |                  |            |
| Tb:NP <sub>2</sub> py=1:2; pH = 10                                                                                       | 488.55                | $^5D_4 \rightarrow ^7F_6$ | 2130             | 2.4        |
|                                                                                                                          | 541.45                | $^5D_4 \rightarrow ^7F_5$ |                  |            |
|                                                                                                                          | 588.00                | $^5D_4 \rightarrow ^7F_4$ |                  |            |
|                                                                                                                          | 621.55                | $^5D_4 \rightarrow ^7F_3$ |                  |            |

**Table 2S.** The complex formation constants of NP2Py with Sm<sup>III</sup>, Eu<sup>III</sup>, Gd<sup>III</sup> and Tb<sup>III</sup> at 25°C, *I*=0.1 mol dm<sup>-1</sup> (NaClO<sub>4</sub>), in 1:1 and 1:2 molar ratios Ln:L.\* The constants are not corrected for Na<sup>+</sup> ions pairing with phosphonate groups at higher pH.

| Metal complexes                         | Sm <sup>3+</sup> | Eu <sup>3+</sup> | Gd <sup>3+</sup> | Tb <sup>3+</sup> |
|-----------------------------------------|------------------|------------------|------------------|------------------|
| <i>Molar ratio Ln:L 1:1</i>             |                  |                  |                  |                  |
| logβ(LnH <sub>3</sub> L)                | 37.99(3)         | 38.15(3)         | 37.85(4)         | 37.74(3)         |
| logβ(LnH <sub>2</sub> L)                | 30.60(6)         | 31.36(7)         | 30.86(10)        | 31.72(7)         |
| logβ(LnHL)                              | -                | -                | -                | 22.61(9)         |
| logβ(LnL)                               | <b>11.87(6)</b>  | <b>12.85(8)</b>  | <b>12.32(10)</b> | <b>13.36(7)</b>  |
| logβ(LnH <sub>-1</sub> L)               | 0.91(8)          | 1.86(10)         | 1.38(10)         | 3.08(8)          |
| pK(LnH <sub>3</sub> L)                  | 7.39             | 6.79             | 6.99             | 6.02             |
| pK(LnH <sub>2</sub> L)**                | -                | -                | -                | 9.11             |
| pK(LnHL)**                              | -                | -                | -                | 9.25             |
| pK(LnL)                                 | 10.96            | 10.99            | 10.94            | 10.28            |
| pK(LnH <sub>-1</sub> L)                 | -                | -                | -                | -                |
| <i>Molar ratio Ln:L 1:2</i>             |                  |                  |                  |                  |
| logβ(LnH <sub>3</sub> L)                | 38.00(2)         | 38.12(2)         | 37.96(2)         | 37.70(4)         |
| logβ(LnH <sub>2</sub> L)                | 30.66(5)         | 31.57(5)         | 31.00(5)         | 31.91(9)         |
| logβ(LnHL)                              | -                | -                | -                | 22.82(11)        |
| logβ(LnL)                               | <b>11.83(5)</b>  | <b>12.85(6)</b>  | <b>12.45(6)</b>  | <b>13.47(10)</b> |
| logβ(LnH <sub>-1</sub> L)               | 0.52(9)          | 1.69(11)         | 1.57(9)          | 3.06(10)         |
| logβ(LnH <sub>2</sub> L <sub>2</sub> )  | 36.49(8)         | 38.07(8)         | 37.09(7)         | -                |
| logβ(LnL <sub>2</sub> )                 | <b>16.99(8)</b>  | <b>18.44(9)</b>  | <b>17.88(7)</b>  | <b>17.86(9)</b>  |
| logβ(LnH <sub>-2</sub> L <sub>2</sub> ) | -4.36(8)         | -                | -2.71(7)         | -                |
| pK(LnH <sub>3</sub> L)                  | 7.34             | 6.55             | 6.96             | 5.79             |
| pK(LnH <sub>2</sub> L)**                | ~2×9.42          | ~2×9.36          | ~2×9.28          | 9.09             |
| pK(LnHL)**                              | -                | -                | -                | 9.35             |
| pK(LnL)                                 | 11.31            | 11.16            | 10.88            | 10.41            |
| pK(LnH <sub>-1</sub> L)                 | -                | -                | -                | -                |
| pK(LnH <sub>2</sub> L <sub>2</sub> )    | -                | -                | -                | -                |
| pK(LnL <sub>2</sub> )                   | -                | -                | -                | -                |
| pK(LnH <sub>-2</sub> L <sub>2</sub> )   | -                | -                | -                | -                |

\*

Comment 1. The obtained data for 1:1 and 1:2 titrations were calculated both as overlapped (giving one logβ data set) and as separate batches. However, since the stoichiometry of the solutions was the crucial issue we decided to show separately calculated data in order to confirm, no changes of respective logβ values in both solutions were detected, as expected. All logβs values were kept as 'refine'.

Comment 2. The stability constants of the Eu<sup>3+</sup>-NP2py complexes were recalculated with the metal aqua ion hydrolysis constants for Eu<sup>3+</sup> as an example among studied Ln<sup>III</sup> [Eu(OH)<sup>2+</sup>, Eu(OH)<sub>3</sub>, Eu(OH)<sub>4</sub><sup>-</sup> and Eu<sub>2</sub>(OH)<sub>3</sub><sup>3+</sup>].<sup>1</sup> Solely above pH 10.5 Eu(OH)<sub>4</sub><sup>-</sup> species is present in the solution with a very minor contribution while the stability constants of Eu<sup>3+</sup>-NP<sub>2</sub>py species were negligibly changed. Apart from it none of the hydrolytic species was found to be present in the solution, also in acidic pH range, which was crucial to verify and simultaneously exclude any hydrolytic species from the calculations.

\*\* pK values of deprotonation of ammonia molecules.

[1] E. Bentouhami, G.M. Bouet, J. Meullemeestre, F. Vierling and M. A. Khan, *C.R. Chimie*, 2004, **7**, 537-545.

**Table 3S.** Stability constants of NP2Py with Eu<sup>3+</sup> at 25°C in different ionic strength (KCl).

| Eu <sup>3+</sup> complexes | <i>I</i> =0.075M | <i>I</i> =0.1M | <i>I</i> =0.2M | <i>I</i> =0.5M | <i>I</i> =1M | <i>I</i> =2M |
|----------------------------|------------------|----------------|----------------|----------------|--------------|--------------|
|----------------------------|------------------|----------------|----------------|----------------|--------------|--------------|

## 1:1 Molar ratio

|                                        |                 |                 |                 |                 |                 |                 |
|----------------------------------------|-----------------|-----------------|-----------------|-----------------|-----------------|-----------------|
| $\log\beta[\text{EuH}_3\text{L}]$      | 37.86(1)        | 37.62(1)        | 37.37(1)        | 36.75(1)        | 36.42(1)        | 36.63(2)        |
| $\log\beta[\text{EuH}_2\text{L}]$      | 32.01(2)        | 31.94(2)        | 31.51(2)        | 31.09(2)        | 30.66(2)        | 31.00(2)        |
| $\log\beta[\text{EuHL}]$               | 23.02(2)        | 22.91(3)        | 22.44(3)        | 22.08(3)        | 21.63(2)        | 21.93(3)        |
| $\log\beta[\text{EuL}]$                | <b>13.64(2)</b> | <b>13.63(3)</b> | <b>13.11(2)</b> | <b>12.75(2)</b> | <b>12.20(2)</b> | <b>12.34(3)</b> |
| $\log\beta[\text{EuH}_{1.5}\text{L}]$  | 3.23(2)         | 3.18(3)         | 2.56(3)         | 2.29(3)         | 1.88(2)         | 1.92(3)         |
| $\text{pK}(\text{EuH}_3\text{L})$      | 5.85            | 5.68            | 5.86            | 5.66            | 5.76            | 5.63            |
| $\text{pK}(\text{EuH}_2\text{L})^{**}$ | 8.99            | 9.03            | 9.07            | 9.01            | 9.03            | 9.07            |
| $\text{pK}(\text{EuHL})^{**}$          | 9.38            | 9.28            | 9.33            | 9.33            | 9.43            | 9.59            |
| $\text{pK}(\text{EuL})$                | 10.41           | 10.45           | 10.55           | 10.46           | 10.32           | 10.42           |
| $\text{pK}(\text{EuH}_{1.5}\text{L})$  | -               | -               | -               | -               | -               | -               |

## 1:2 Molar ratio

|                                       |                 |                 |                 |                 |                 |                 |
|---------------------------------------|-----------------|-----------------|-----------------|-----------------|-----------------|-----------------|
| $\log\beta[\text{EuH}_3\text{L}]$     | 37.33(2)        | 37.31(1)        | 36.99(1)        | 36.42(1)        | 36.05(1)        | 36.34(2)        |
| $\log\beta[\text{EuH}_2\text{L}]$     | 31.68(5)        | 31.99(4)        | 30.91(2)        | 30.78(2)        | 30.16(2)        | 30.75(4)        |
| $\log\beta[\text{EuHL}]$              | 22.88(7)        | 23.39(5)        | 22.14(2)        | 22.08(3)        | 21.56(2)        | 22.28(4)        |
| $\log\beta[\text{EuL}]$               | <b>13.69(7)</b> | <b>14.12(4)</b> | <b>12.83(2)</b> | <b>12.87(2)</b> | <b>12.30(2)</b> | <b>12.88(4)</b> |
| $\log\beta[\text{EuH}_{1.5}\text{L}]$ | -               | -               | -               | -               | 1.21(8)         | 2.03(11)        |
| $\log\beta[\text{EuL}_2]^{5-}$        | <b>18.05(6)</b> | <b>18.78(4)</b> | <b>17.39(2)</b> | <b>16.89(2)</b> | <b>16.44(3)</b> | <b>16.89(7)</b> |
| $\text{pK}(\text{EuH}_3\text{L})$     | 5.65            | 5.32            | 6.08            | 5.64            | 5.89            | 5.65            |
| $\text{pK}(\text{EuH}_2\text{L})$     | 8.80            | 8.60            | 8.77            | 8.70            | 8.60            | 8.47            |
| $\text{pK}(\text{EuHL})$              | 9.19            | 9.27            | 9.31            | 9.21            | 9.26            | 9.40            |
| $\text{pK}(\text{EuL})$               | -               | -               | -               | -               | 11.09           | 10.85           |
| $\text{pK}(\text{EuH}_{1.5}\text{L})$ | -               | -               | -               | -               | -               | -               |

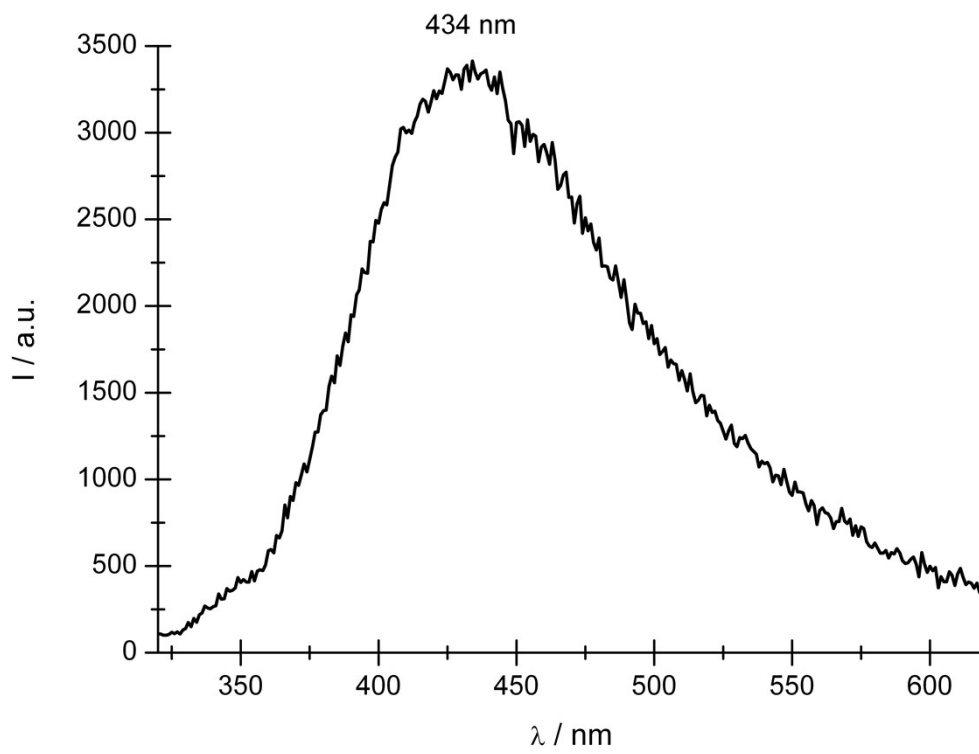

**Figure 1S.** Fosforescence spectrum of [C(NH<sub>2</sub>)<sub>3</sub>]<sub>5</sub>[Gd(NP<sub>2</sub>py)<sub>2</sub>]<sub>2</sub>·12H<sub>2</sub>O crystals at 77K.

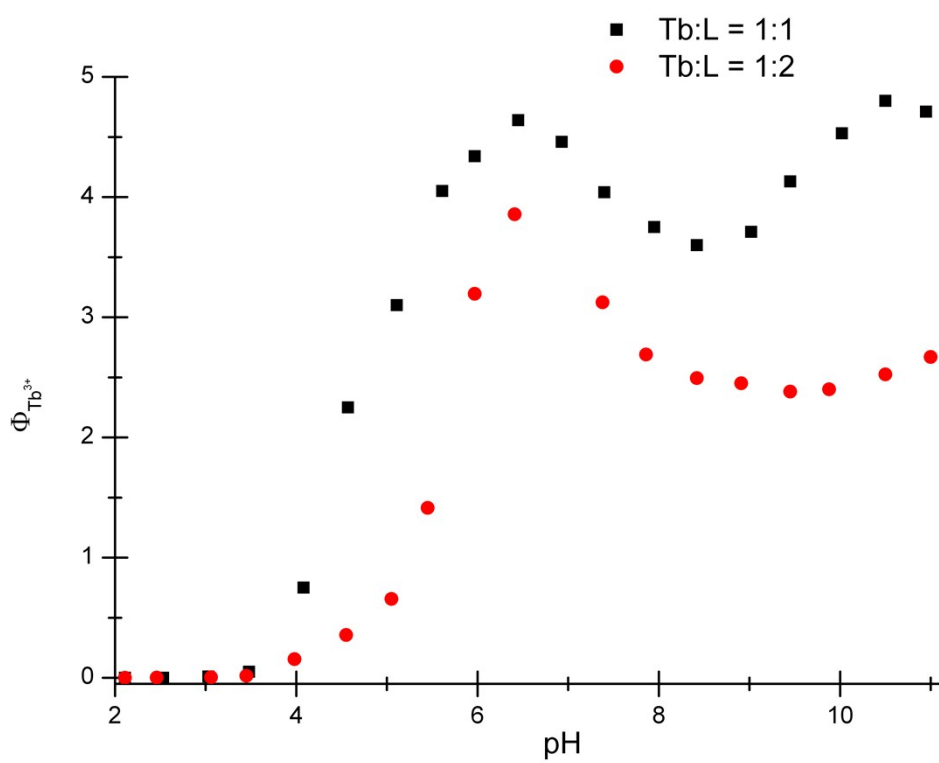

**Figure 2S.** The plot of luminescence quantum yields of Tb:NP<sub>2</sub>py 1:1 and 1:2 systems versus pH.

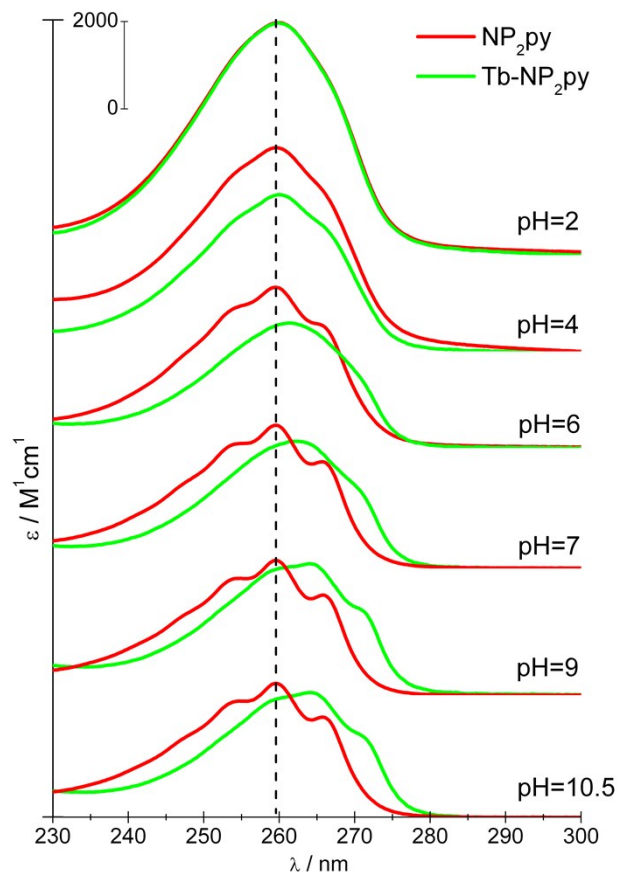

**Figure 3S.** UV spectra of NP<sub>2</sub>py ligand and Tb:NP<sub>2</sub>py complex at various pH.



### Number of coordinated H<sub>2</sub>O molecules to the Eu<sup>3+</sup> cation

The number of coordinated water molecules to Eu<sup>3+</sup> ( $q_{\text{H}_2\text{O}}$ ) as a function of pH for solutions with Eu:NP<sub>2</sub>py ratios of 1:1 and 1:2 were determined (Figure 9) using the formula 1:<sup>[1]</sup>

$$q_{\text{H}_2\text{O}} = 1.05 \cdot \frac{1}{\tau_{\text{H}_2\text{O}}} - 0.7 \quad (1)$$

where  $\tau_{\text{H}_2\text{O}}$  is a luminescence lifetime (in ms) of the <sup>5</sup>D<sub>0</sub> state. The error of estimation of  $q_{\text{H}_2\text{O}}$  is about  $\pm 0.5$ .

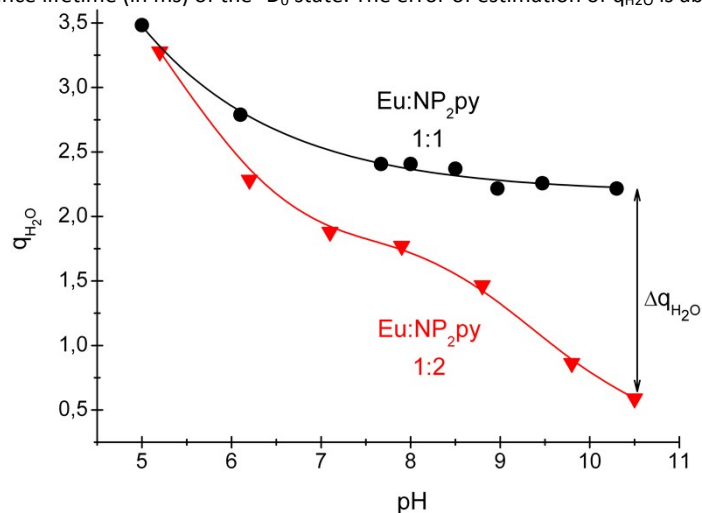

Figure 4S. Plot of  $q_{\text{H}_2\text{O}}$  versus pH of solution for the Eu-NP<sub>2</sub>py complex with Eu:NP<sub>2</sub>py ratio of 1:1 and 1:2. The  $\Delta q_{\text{H}_2\text{O}}$  is the difference between  $q_{\text{H}_2\text{O}}$  for 1:1 and 1:2 solutions at the same pH.

As it is seen in Figure 4S, the  $q_{\text{H}_2\text{O}}$  values monotonically decrease with an increase of pH. The  $q_{\text{H}_2\text{O}}$  numbers are similar within the limits of experimental error for both solutions in the pH range between 5 and 8. At pH above 8, the  $q_{\text{H}_2\text{O}}$  is about 2.5 for Eu:NP<sub>2</sub>py 1:1 system. For the solution with Eu:NP<sub>2</sub>py = 1:2 at pH =10.5, the  $q_{\text{H}_2\text{O}}$  is ca. 0.6. The  $\Delta q_{\text{H}_2\text{O}}$  values, being the difference between  $q_{\text{H}_2\text{O}}$  for 1:1 and 1:2 solutions at the same pH, dramatically increase at pH above 8. This result indicates that for solutions of Eu:NP<sub>2</sub>py = 1:2 at pH > 8 the gradual increase of molar fraction of the  $[\text{Eu}(\text{NP}_2\text{py})_2]^{5-}$  species takes place. Similar dependences were observed for Tb<sup>3+</sup>-NP<sub>2</sub>py systems (Figure 5S).

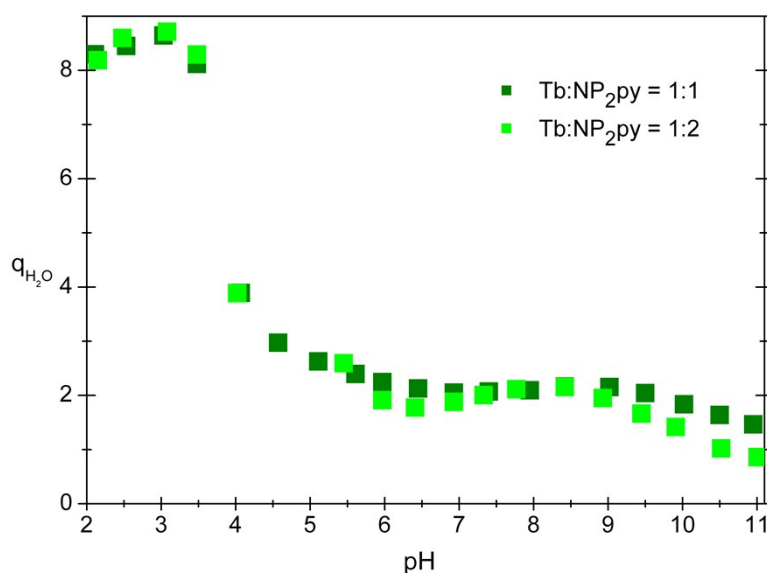

Figure 5S. Plot of  $q_{\text{H}_2\text{O}}$  versus pH of solution for the Tb-NP<sub>2</sub>py complex with Tb:NP<sub>2</sub>py ratio of 1:1 and 1:2.

[1] T. Kimura, Y. Kato, *J. Alloys. Compd.*, 1995, 225, 284.

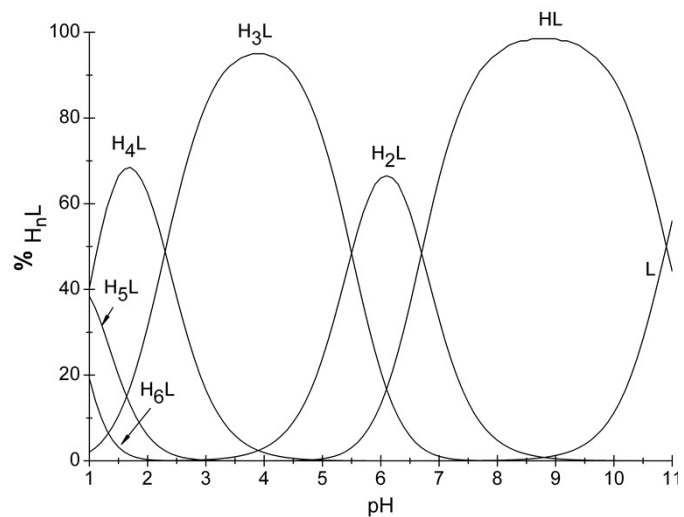

**Figure 6S.** Species distribution curves of  $H_6NP_2py$  acid (L). Charges omitted for brevity.

**Figure 75.** Species distribution curves for the  $\text{Ln}^{3+}$ - $\text{N}_2\text{Py}$  complexes as a function of pH for 1:1 Ln:L molar ratio (A) and 1:2 Ln:L (B). Equimolar complexes are marked in blue, biscomplexes in red color,  $I=0.1\text{MNaClO}_4$ ,  $25^\circ\text{C}$

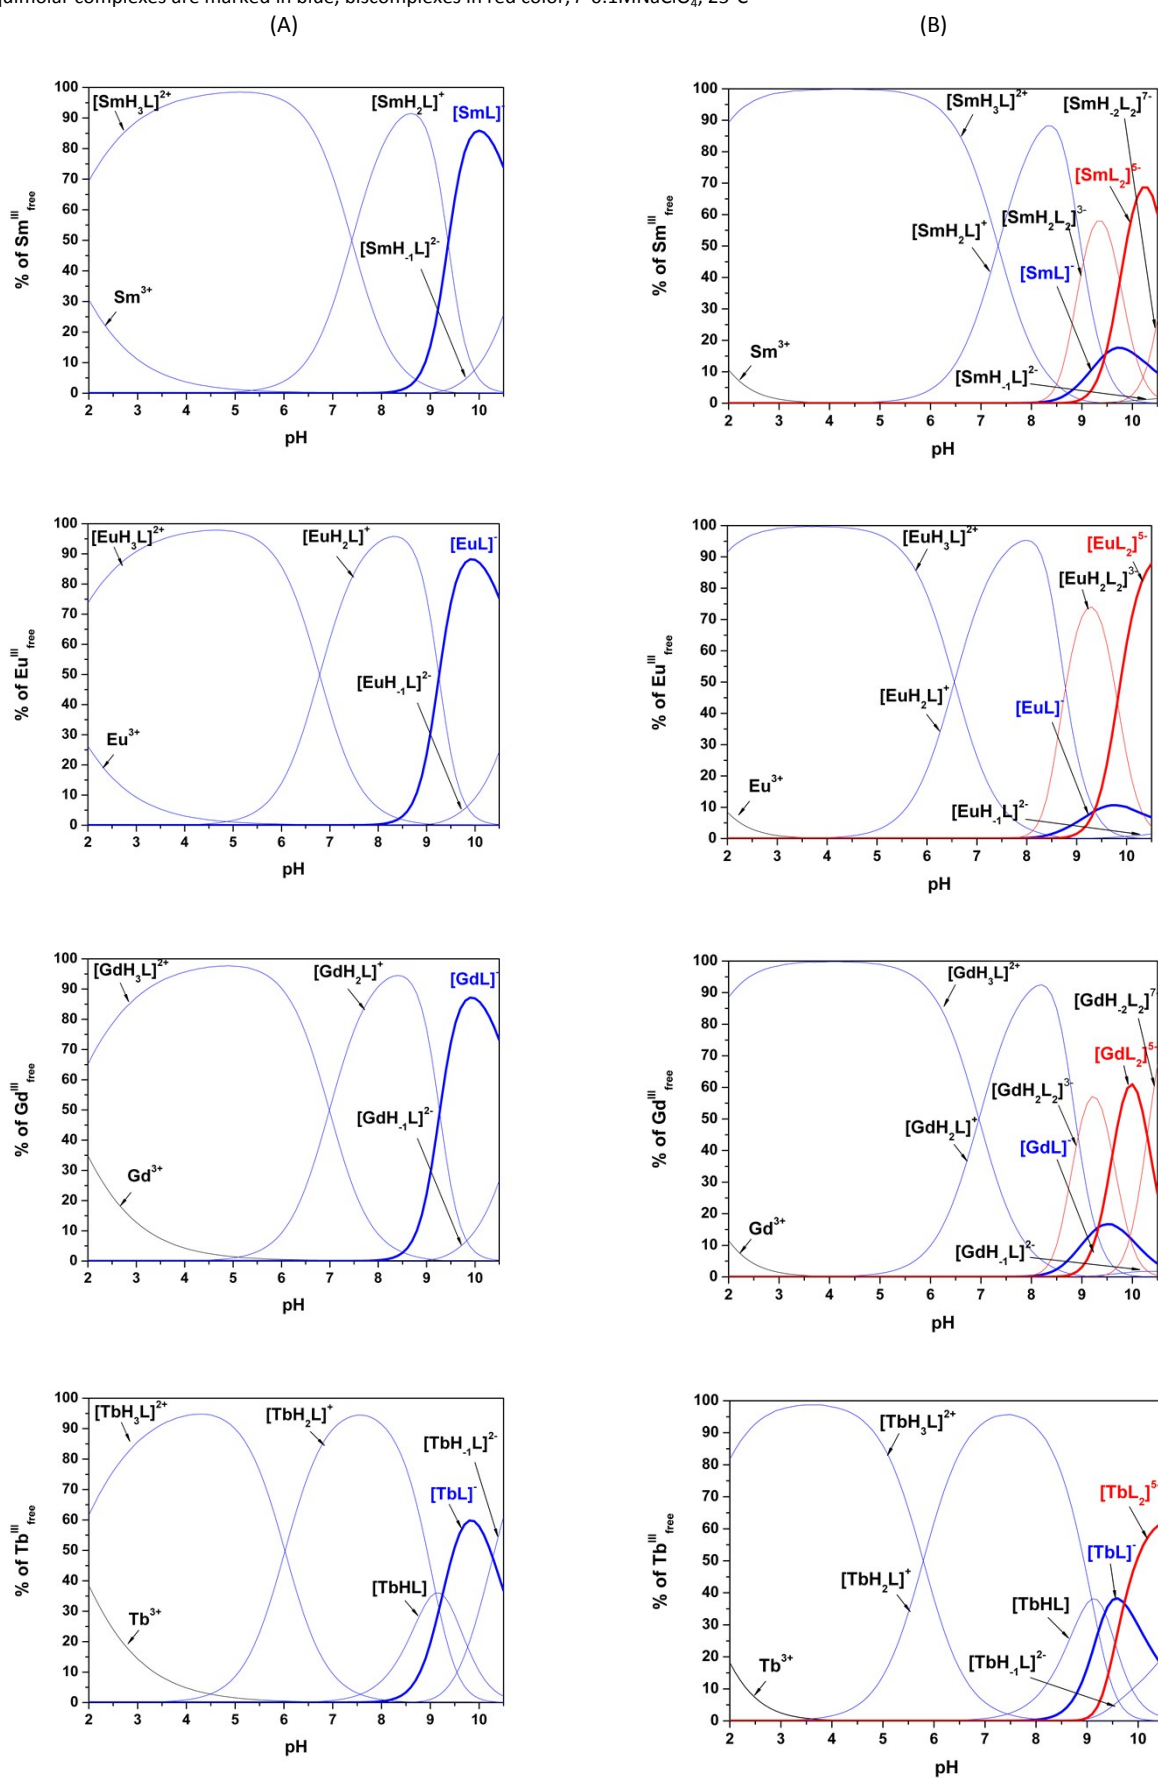

Supplement: c7qi00191f1.pdf [file c7qi00191f1.pdf]
